# Supplementary material
Source: ML conference proceedings conference paper supplement (https://proceedings.neurips.cc/paper_files/paper/2007/hash/19b650660b253761af189682e03501dd-Abstract.html)
Supplement: Supplementary file 2 [file 19b650660b253761af189682e03501dd-Supplemental.zip]

---

# Fast and Scalable Training of Semi-Supervised CRFs with Application to Activity Recognition

---

## Supporting Material

### 1 Classification accuracies for the activity recognition datasets

| Class                | Average Accuracy (%) |                |                |
|----------------------|----------------------|----------------|----------------|
|                      | ML+all obs           | ML+Boost       | VEB            |
| Sitting              | 74.1 $\pm$ 5.2       | 84.8 $\pm$ 3.3 | 86.8 $\pm$ 5.1 |
| Standing             | 68.7 $\pm$ 4.6       | 84.2 $\pm$ 3.1 | 89.6 $\pm$ 5.2 |
| Walking              | 84.5 $\pm$ 3.1       | 89.7 $\pm$ 2.4 | 93.7 $\pm$ 3.8 |
| Walking up stairs    | 74.2 $\pm$ 2.8       | 86.5 $\pm$ 1.9 | 95.3 $\pm$ 3.4 |
| Walking-down-stairs  | 80.9 $\pm$ 2.5       | 85.3 $\pm$ 2.3 | 92.5 $\pm$ 2.4 |
| Riding elevator down | 76.3 $\pm$ 2.7       | 83.6 $\pm$ 1.5 | 95.1 $\pm$ 3.1 |
| Riding elevator up   | 79.4 $\pm$ 2.2       | 84.7 $\pm$ 1.7 | 96.8 $\pm$ 1.9 |
| Brushing teeth       | 84 $\pm$ 1.8         | 90.3 $\pm$ 1.3 | 98.2 $\pm$ 1.7 |

Table 1: Average class accuracy  $\pm$  95% confidence interval of supervised algorithms on dataset 1.

| Class                | Average Accuracy (%) |                |                |
|----------------------|----------------------|----------------|----------------|
|                      | ML+all obs           | ML+Boost       | VEB            |
| Sitting              | 75.9 $\pm$ 3.5       | 82.5 $\pm$ 3.5 | 82.5 $\pm$ 3.8 |
| Standing             | 68.1 $\pm$ 4.2       | 77.4 $\pm$ 5.2 | 77.4 $\pm$ 5.7 |
| Walking              | 75 $\pm$ 4.8         | 79.6 $\pm$ 4.6 | 79.6 $\pm$ 4.1 |
| Walking up stairs    | 76.4 $\pm$ 2.1       | 84.2 $\pm$ 2.4 | 84.2 $\pm$ 2.9 |
| Walking-down-stairs  | 78.6 $\pm$ 2.2       | 83.9 $\pm$ 2   | 83.9 $\pm$ 2.5 |
| Riding elevator down | 75.2 $\pm$ 2.4       | 84.4 $\pm$ 2.6 | 84.4 $\pm$ 3.1 |
| Riding elevator up   | 78.7 $\pm$ 2.1       | 85.1 $\pm$ 2.9 | 85.1 $\pm$ 3.2 |
| Brushing teeth       | 83.1 $\pm$ 1.5       | 89.8 $\pm$ 1.4 | 89.8 $\pm$ 2.3 |

Table 2: Average class accuracy  $\pm$  95% confidence interval of semi-supervised algorithms on dataset 1.

| Class          | Average Accuracy (%) |                |                |
|----------------|----------------------|----------------|----------------|
|                | ML+all obs           | ML+Boost       | VEB            |
| Computer usage | 88.1 $\pm$ 3.6       | 88.6 $\pm$ 3.4 | 92.1 $\pm$ 4.4 |
| Having meal    | 83.7 $\pm$ 2.5       | 89.2 $\pm$ 2.9 | 96.9 $\pm$ 4.9 |
| Meeting        | 84.3 $\pm$ 4.2       | 85.1 $\pm$ 4.5 | 88.6 $\pm$ 5.6 |
| Watching TV    | 85.4 $\pm$ 2.9       | 86 $\pm$ 2.7   | 92.7 $\pm$ 4   |
| Sleeping       | 87.2 $\pm$ 2.1       | 87.9 $\pm$ 2.3 | 97.4 $\pm$ 3.9 |

Table 3: Average class accuracy  $\pm$  95% confidence interval of supervised algorithms on dataset 2.

| Class          | Average Accuracy (%) |                |                |
|----------------|----------------------|----------------|----------------|
|                | ML+all obs           | ML+Boost       | VEB            |
| Computer usage | 75.4 $\pm$ 3.1       | 78.8 $\pm$ 2.5 | 81.6 $\pm$ 3.9 |
| Having meal    | 72.9 $\pm$ 2.5       | 74.3 $\pm$ 3.2 | 90.9 $\pm$ 4.1 |
| Meeting        | 71.3 $\pm$ 5.5       | 70.1 $\pm$ 4.8 | 84.5 $\pm$ 4.5 |
| Watching TV    | 74.1 $\pm$ 4.3       | 73.9 $\pm$ 3.1 | 83.7 $\pm$ 5.1 |
| Sleeping       | 80.6 $\pm$ 2.9       | 85.6 $\pm$ 2.4 | 94.9 $\pm$ 2.6 |

Table 4: Average class accuracy  $\pm$  95% confidence interval of semi-supervised algorithms on dataset 2.
