# Supplementary material
Source: ML conference proceedings conference paper supplement (https://proceedings.neurips.cc/paper_files/paper/2007/hash/19b650660b253761af189682e03501dd-Abstract.html)
Supplement: Supplementary file 3 [file 19b650660b253761af189682e03501dd-Supplemental.zip]

Archive with 2 entries (2 files):
- 863.pdf
- 863_suplpementaryMaterial.pdf
